# Supplementary material
Source: publisher figshare collection journal article supplement (https://frontiersin.figshare.com/ndownloader/files/24988859)
Supplement: Supplementary file [file 24988859]

## Supplementary Material

### 1 Measures

Please note that in our study, all measures were administered in German language. For this supplement they were translated to English.

#### 1.1 Mathematics self-efficacy (adapted from Jerusalem & Satow, 1999)

*Think of the subject mathematics when indicating your degree of agreement or disagreement with the following statements.*

|                                                                                              | not true<br>at all       | rather<br>not true       | neither                  | rather<br>true           | exactly<br>true          |
|----------------------------------------------------------------------------------------------|--------------------------|--------------------------|--------------------------|--------------------------|--------------------------|
| If I try hard enough, I can even solve difficult assignments.                                | <input type="checkbox"/> | <input type="checkbox"/> | <input type="checkbox"/> | <input type="checkbox"/> | <input type="checkbox"/> |
| In math, it is easy for me to understand new things.                                         | <input type="checkbox"/> | <input type="checkbox"/> | <input type="checkbox"/> | <input type="checkbox"/> | <input type="checkbox"/> |
| If I had to solve a difficult problem at the blackboard, I believe I would perform well.     | <input type="checkbox"/> | <input type="checkbox"/> | <input type="checkbox"/> | <input type="checkbox"/> | <input type="checkbox"/> |
| Even if I would be sick for a longer period of time, I would perform well.                   | <input type="checkbox"/> | <input type="checkbox"/> | <input type="checkbox"/> | <input type="checkbox"/> | <input type="checkbox"/> |
| I am sure I can perform well even if the teacher is doubting my abilities.                   | <input type="checkbox"/> | <input type="checkbox"/> | <input type="checkbox"/> | <input type="checkbox"/> | <input type="checkbox"/> |
| If I get a poor grade in math, I am still confident that I can get the grade I want in math. | <input type="checkbox"/> | <input type="checkbox"/> | <input type="checkbox"/> | <input type="checkbox"/> | <input type="checkbox"/> |

#### 1.2 Past mastery experience

*Which grade did you receive on your last report card in the following subjects?*

##### Mathematics

- ☐ very good (1)
- ☐ good (2)
- ☐ satisfactory (3)
- ☐ sufficient (4)

- ☐ inadequate (5)  
☐ insufficient (6)

**1.3 Situational mastery experience (example items from TIMSS; Baumert, Bos, Klieme, Lehmann, Lehrke, Hosenfeld, & Neubrand, 1999)**

**Task 2)**

*Which of the following mathematical expressions is equivalent to  $y^3$ ?*

- ☐ A.  $y + y + y$   
☐ B.  $y \cdot y \cdot y$   
☐ C.  $3y$   
☐ D.  $y^2 + y$

**Task 6)**

*This figure is being rotated.*

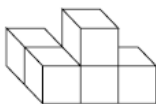

*Which of the following figures do you get when rotating the one depicted above?*

☐ A.

☐ B.

☐ C.

☐ D.

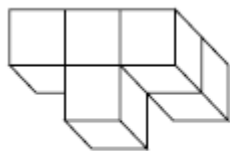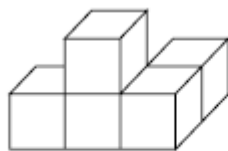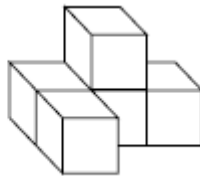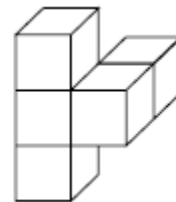

**Task 8)**

*If  $\frac{12}{n} = \frac{36}{21}$ , then  $n$  is equivalent to*

- ☐ A. 3  
☐ B. 7  
☐ C. 36  
☐ D. 63

**Task 11)**

Which of the following angles is closest to  $30^\circ$ ?

☐ A.

☐ B.

☐ C.

☐ D.
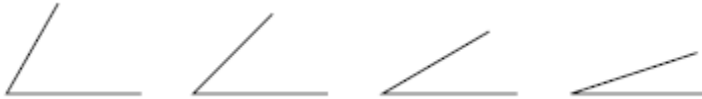**Task 20)**

Peter buys 70 pieces of one product, Susi buys 90 pieces. Every piece has the same price. In total, the pieces cost 800 Euro. How much does Susi have to pay?

Answer: Susi pays \_\_\_\_\_

**1.4 Situational mastery experience: Cognitive component**

What do you think, how many items in the test did you solve correctly? Please make a cross on the line below.

none correct  all correct

**1.5 Situational mastery experience: Affective component (adapted from Heatherton & Polivy, 1991)**

How do you feel at the moment?

|                                                            | not true<br>at all       | rather<br>not true       | neither                  | rather<br>true           | exactly<br>true          |
|------------------------------------------------------------|--------------------------|--------------------------|--------------------------|--------------------------|--------------------------|
| I feel confident about my abilities.                       | <input type="checkbox"/> | <input type="checkbox"/> | <input type="checkbox"/> | <input type="checkbox"/> | <input type="checkbox"/> |
| I feel frustrated or rattled about my performance.         | <input type="checkbox"/> | <input type="checkbox"/> | <input type="checkbox"/> | <input type="checkbox"/> | <input type="checkbox"/> |
| I am afraid there is not much I can be proud of right now. | <input type="checkbox"/> | <input type="checkbox"/> | <input type="checkbox"/> | <input type="checkbox"/> | <input type="checkbox"/> |
| I feel as smart as others.                                 | <input type="checkbox"/> | <input type="checkbox"/> | <input type="checkbox"/> | <input type="checkbox"/> | <input type="checkbox"/> |

|                                                                   |                          |                          |                          |                          |                          |
|-------------------------------------------------------------------|--------------------------|--------------------------|--------------------------|--------------------------|--------------------------|
| I feel confident that I understand things.                        | <input type="checkbox"/> | <input type="checkbox"/> | <input type="checkbox"/> | <input type="checkbox"/> | <input type="checkbox"/> |
| I feel that I have less scholastic ability right now than others. | <input type="checkbox"/> | <input type="checkbox"/> | <input type="checkbox"/> | <input type="checkbox"/> | <input type="checkbox"/> |
| I have like I'm not doing well.                                   | <input type="checkbox"/> | <input type="checkbox"/> | <input type="checkbox"/> | <input type="checkbox"/> | <input type="checkbox"/> |

## 1.6 Social persuasion

|                                                                                                                      |       |       |
|----------------------------------------------------------------------------------------------------------------------|-------|-------|
| Please name the aliases of the persons <b>that you</b> would ask for <b>help</b> regarding <u>homework in math</u> . |       |       |
| _____                                                                                                                | _____ | _____ |

## 1.7 Vicarious experiences

*For some of the items in the following math test, you will be asked to evaluate your performance and to compare it to the performance of another classmate. You can now choose this person. Please take a look at the list of aliases that your teacher handed out and write down the alias of this student here:*

|  |
|--|
|  |
|--|

## References

- Baumert, J., Bos, W., Klieme, E., Lehmann, R., Lehrke, M., Hosenfeld, I., Neubrand, J., & Watermann, R. (Eds.). (1999). *Testaufgaben zu TIMSS/II Mathematisch-naturwissenschaftliche Grundbildung und voruniversitäre Mathematik und Physik der Abschlußklassen der Sekundarstufe II (Population 3)*. Berlin: Max-Planck-Institut für Bildungsforschung.
- Heatherton, T. F., & Polivy, J. (1991). Development and validation of a scale for measuring state self-esteem. *Journal of Personality and Social Psychology*, 60(6), 895-910. doi: 10.1037/0022-3514.60.6.895
- Jerusalem, M., & Satow, L. (1999). Schulbezogene Selbstwirksamkeitserwartung. In R. Schwarzer & M. Jerusalem (Eds.), *Skalen zur Erfassung von Lehrer- und Schülermerkmalen. Dokumentation der psychometrischen Verfahren im Rahmen der wissenschaftlichen Begleitung des Modellversuchs Selbstwirksame Schulen* (pp. 15-16). Berlin: Humboldt Universität zu Berlin, Freie Universität Berlin.

## 2 Supplementary Analyses

### Preliminary Analyses

For mathematics self-efficacy, the configural invariance model was a good fit to the data ( $\chi^2 = 106.584$ ;  $df = 18$ ;  $p \leq .001$ ; CFI = .947; RMSEA = .128 (90% CI = .105/.151); SRMR = .041). The fit of the metric invariance was also good ( $\chi^2 = 109.626$ ;  $df = 23$ ;  $p \leq .001$ ; CFI = .948; RMSEA = .112 (90% CI = .091/.133); SRMR = .047), and imposing constraints on the factor loadings did not diminish model fit ( $\Delta\chi^2 = 3.042$ ;  $df = 5$ ;  $p = .694$ ). Thus, metric invariance was supported. After adding constraints on item intercepts across gender, overall model fit was still good ( $\chi^2 = 117.989$ ;  $df = 28$ ;  $p \leq .001$ ; CFI = .946; RMSEA = .103 (90% CI = .084/.123); SRMR = .050), and showed no reduction in model fit compared to the metric one ( $\Delta\chi^2 = 8.364$ ;  $df = 5$ ;  $p = .137$ ), thereby supporting scalar invariance.

The configural invariance model for state self-esteem was a good fit to the data ( $\chi^2 = 105.590$ ;  $df = 28$ ;  $p \leq .001$ ; CFI = .944; RMSEA = .085 (90% CI = .068/.103); SRMR = .042). The metric invariance model was also a good fit to the data ( $\chi^2 = 117.898$ ;  $df = 34$ ;  $p \leq .001$ ; CFI = .940; RMSEA = .080 (90% CI = .065/.096); SRMR = .056), and showed no significant reduction in model fit compared to the configural one ( $\Delta\chi^2 = 12.308$ ;  $df = 6$ ;  $p = .055$ ), thereby supporting metric invariance. After imposing constraints on item intercepts across gender to test for scalar invariance, model fit was still good ( $\chi^2 = 135.489$ ;  $df = 40$ ;  $p \leq .001$ ; CFI = .932; RMSEA = .079 (90% CI = .065/.094); SRMR = .068), but showed a reduction in model fit compared to the metric one ( $\Delta\chi^2 = 17.592$ ;  $df = 6$ ;  $p \leq .01$ ). However, due to its sensitivity to large samples, this test is not fully appropriate for our sample size (cf., Schermelleh-Engel, Moosbrugger, & Müller, 2003). Therefore, we evaluated our data according to Chen (2007): If the CFI does not decrease by more than .010 units (in our case  $\Delta\text{CFI} = .008$ ), the RMSEA does not increase by more than .015 units (in our case  $\Delta\text{RMSEA} = -0.001$ ), and the SRMR does not increase by .015 units (in our case  $\Delta\text{SRMR} = .012$ ) across models, measurement invariance can be assumed. Thus, scalar invariance was supported and the statistical prerequisites for mean value comparisons between both groups were met.

### References

- Chen, F. F. (2007). Sensitivity of goodness of fit indexes to lack of measurement invariance. *Structural Equation Modeling, 14*(3), 464-504. doi: 10.1080/10705510701301834
- Schermelleh-Engel, K., Moosbrugger, H., & Müller, H. (2003). Evaluating the fit of structural equation models: Tests of significance and descriptive goodness-of-fit measures. *Methods of Psychological Research, 8*(2), 23-74.

### 3 Supplementary Tables

Supplementary Table 1

*Regression models predicting students' mathematics self-efficacy for girls and boys*

|                                            | <i>B (SE)</i> |                        |       |                        | $\beta$ |       | $\chi^2 (df)$ |
|--------------------------------------------|---------------|------------------------|-------|------------------------|---------|-------|---------------|
|                                            | Girls         |                        | Boys  |                        | Girls   | Boys  |               |
| <b>Model 1</b>                             |               |                        |       |                        |         |       |               |
| Test performance <sup>a</sup>              | 0.015         | (0.004) <sup>***</sup> | 0.016 | (0.004) <sup>***</sup> | 0.211   | 0.232 | 0.038 (1)     |
| <b>Model 2</b>                             |               |                        |       |                        |         |       |               |
| Test performance <sup>a</sup>              | 0.004         | (0.003)                | 0.004 | (0.004)                | 0.065   | 0.064 |               |
| Student's mathematics grade <sup>a</sup>   | 0.414         | (0.043) <sup>***</sup> | 0.386 | (0.057) <sup>***</sup> | 0.468   | 0.466 | 0.300 (2)     |
| <b>Model 3</b>                             |               |                        |       |                        |         |       |               |
| Test performance <sup>a</sup>              | 0.015         | (0.003) <sup>***</sup> | 0.017 | (0.004) <sup>***</sup> | 0.212   | 0.253 |               |
| Self-enhancement score (cognitive)         | 0.190         | (0.047) <sup>***</sup> | 0.267 | (0.043) <sup>***</sup> | 0.214   | 0.310 | 1.339 (2)     |
| <b>Model 4</b>                             |               |                        |       |                        |         |       |               |
| Test performance <sup>a</sup>              | 0.006         | (0.004)                | 0.010 | (0.004) <sup>**</sup>  | 0.086   | 0.156 |               |
| State self-esteem (affective) <sup>a</sup> | 0.423         | (0.058) <sup>***</sup> | 0.303 | (0.062) <sup>***</sup> | 0.421   | 0.296 | 2.466 (2)     |
| <b>Model 5</b>                             |               |                        |       |                        |         |       |               |
| Test performance <sup>a</sup>              | 0.009         | (0.003) <sup>**</sup>  | 0.011 | (0.004) <sup>**</sup>  | 0.132   | 0.162 |               |
| Social persuasion score <sup>b</sup>       | 0.205         | (0.035) <sup>***</sup> | 0.161 | (0.040) <sup>***</sup> | 0.308   | 0.271 | 0.912 (2)     |
| <b>Model 6</b>                             |               |                        |       |                        |         |       |               |
| Test performance <sup>a</sup>              | 0.014         | (0.004) <sup>***</sup> | 0.014 | (0.004) <sup>***</sup> | 0.198   | 0.213 |               |
| Mathematics grade CP <sup>a</sup>          | 0.104         | (0.040) <sup>**</sup>  | 0.099 | (0.045) <sup>*</sup>   | 0.117   | 0.123 | 0.015 (2)     |
| <b>Model 7</b>                             |               |                        |       |                        |         |       |               |
| Test performance <sup>a</sup>              | -0.001        | (0.003)                | 0.005 | (0.004)                | -0.011  | 0.069 |               |
| Student's mathematics grade <sup>a</sup>   | 0.300         | (0.053) <sup>***</sup> | 0.295 | (0.064) <sup>***</sup> | 0.336   | 0.356 |               |
| Self-enhancement score (cognitive)         | 0.036         | (0.050)                | 0.174 | (0.047) <sup>***</sup> | 0.041   | 0.202 |               |
| State self-esteem (affective) <sup>a</sup> | 0.311         | (0.068) <sup>***</sup> | 0.115 | (0.069)                | 0.307   | 0.112 |               |
| Social persuasion score <sup>b</sup>       | 0.057         | (0.042)                | 0.023 | (0.041)                | 0.084   | 0.038 |               |
| Mathematics grade CP <sup>a</sup>          | 0.012         | (0.035)                | 0.050 | (0.036)                | 0.013   | 0.062 | 7.704 (6)     |

$N = 764$ . All values were estimated using Mplus and full information maximum likelihood (FIML). Standard errors were adjusted for the nesting of students within classes. In the last column,  $\chi^2$  differences between a fully unconstrained model and a model assuming equal regression coefficients between girls and boys are indicated. CP = comparison partner. <sup>a</sup> This variable was centered on the group mean. <sup>b</sup> Due to the high skewness of the social persuasion score,  $\ln(\text{score}+1)$  was taken for all analyses. \*\*  $p < .01$ . \*\*\*  $p < .001$ .

Supplementary Table 2

*Direct and indirect effects of gender on students' mathematics self-efficacy*

|                                            | Regression coefficient |         | Indirect effect of gender on MS via |                |
|--------------------------------------------|------------------------|---------|-------------------------------------|----------------|
|                                            | <i>B</i> ( <i>SE</i> ) | $\beta$ | <i>B</i> ( <i>SE</i> )              | Indirect/Total |
| <b>Model 1</b>                             |                        |         |                                     |                |
| Gender                                     | -0.405 (0.066)***      | -0.228  |                                     |                |
| <b>Model 2</b>                             |                        |         |                                     |                |
| Gender                                     | -0.325 (0.067)***      | -0.183  |                                     |                |
| Test performance <sup>a</sup>              | 0.015 (0.003)***       | 0.218   | -0.074 (0.020)***                   | 18.3%          |
| <b>Model 3</b>                             |                        |         |                                     |                |
| Gender                                     | -0.325 (0.058)***      | -0.184  |                                     |                |
| Test performance <sup>a</sup>              | 0.005 (0.003)          | 0.066   | -0.022 (0.014)                      | 5.4%           |
| Student's mathematics grade <sup>a</sup>   | 0.404 (0.037)***       | 0.463   | -0.041 (0.037)                      | 10.1%          |
| <b>Model 4</b>                             |                        |         |                                     |                |
| Gender                                     | -0.228 (0.073)**       | -0.128  |                                     |                |
| Test performance <sup>a</sup>              | 0.015 (0.003)***       | 0.225   | -0.076 (0.021)***                   | 18.8%          |
| Self-enhancement score (cognitive)         | 0.223 (0.031)***       | 0.254   | -0.096 (0.020)***                   | 23.7%          |
| <b>Model 5</b>                             |                        |         |                                     |                |
| Gender                                     | -0.214 (0.055)***      | -0.122  |                                     |                |
| Test performance <sup>a</sup>              | 0.008 (0.003)**        | 0.115   | -0.039 (0.014)**                    | 9.6%           |
| State self-esteem (affective) <sup>a</sup> | 0.375 (0.046)***       | 0.374   | -0.141 (0.032)***                   | 34.8%          |
| <b>Model 6</b>                             |                        |         |                                     |                |
| Gender                                     | -0.350 (0.066)***      | -0.200  |                                     |                |
| Test performance <sup>a</sup>              | 0.010 (0.002)***       | 0.146   | -0.049 (0.015)**                    | 12.1%          |
| Social persuasion score <sup>b</sup>       | 0.183 (0.030)***       | 0.285   | 0.006 (0.020)                       | -1.5%          |
| <b>Model 7</b>                             |                        |         |                                     |                |
| Gender                                     | -0.319 (0.065)***      | -0.180  |                                     |                |
| Test performance <sup>a</sup>              | 0.014 (0.003)***       | 0.203   | -0.069 (0.019)***                   | 17.0%          |
| Mathematics grade CP <sup>a</sup>          | 0.106 (0.033)**        | 0.121   | -0.017 (0.010)                      | 4.2%           |
| <b>Model 8</b>                             |                        |         |                                     |                |
| Gender                                     | -0.180 (0.060)**       | -0.104  |                                     |                |
| Test performance <sup>a</sup>              | 0.009 (0.003)***       | 0.133   | -0.044 (0.015)**                    | 10.9%          |
| Self-enhancement score (cognitive)         | 0.108 (0.037)**        | 0.126   | -0.047 (0.017)**                    | 11.6%          |
| State self-esteem (affective) <sup>a</sup> | 0.329 (0.054)***       | 0.332   | -0.123 (0.033)***                   | 30.4%          |

Notes. *N* = 764. All values were estimated using Mplus and full information maximum likelihood (FIML). Standard errors were adjusted for the nesting of students within classes. % Indirect effect is calculated by dividing the specific indirect effect through the total estimated effect of gender on students' mathematics self-efficacy. Gender: 0 = boys, 1 = girls. MS = mathematics self-efficacy; CP = comparison partner. <sup>a</sup> This variable was

---

centered around the group mean.<sup>b</sup> Due to the high skewness of the social persuasion score,  $\ln(\text{score}+1)$  was taken for all analyses. <sup>\*\*</sup> $p < .01$ . <sup>\*\*\*</sup> $p < .001$ .
